# Supplementary material for: Synthesis of α-Diimine Complex Enabling Rapidly Covalent Attachment to Silica Supports and Application of Homo-/Heterogeneous Catalysts in Ethylene Polymerization
Source: MDPI journal article supplement (doi:10.3390/ijms241713645), 2023-09-04
Supplement: s1 [file s1]

## Supplementary Information

# Synthesis of $\alpha$ -Diimine Complex Enabling Rapidly Covalent Attachment to Silica Supports and Application of Homo-/Heterogeneous Catalysts in Ethylene Polymerization

Xiaobei Zhao <sup>1</sup>, Yanhui Hou <sup>2,\*</sup>, Linlin Ye <sup>1</sup>, Kening Zong <sup>1</sup>, Qingming An <sup>2</sup>, Binyuan Liu <sup>1</sup> and Min Yang <sup>1,\*</sup>

<sup>1</sup> Hebei Key Laboratory of Functional Polymers, Institute of Polymer Science and Engineering, Hebei University of Technology, Tianjin 300130, China

<sup>2</sup> State Key Laboratory of Separation Membranes and Membrane Processes, School of Material Science and Engineering, Tiangong University, Tianjin 300160, China

\* Correspondence: houyh1977@163.com (Y.H.); polyym@163.com (M.Y.)

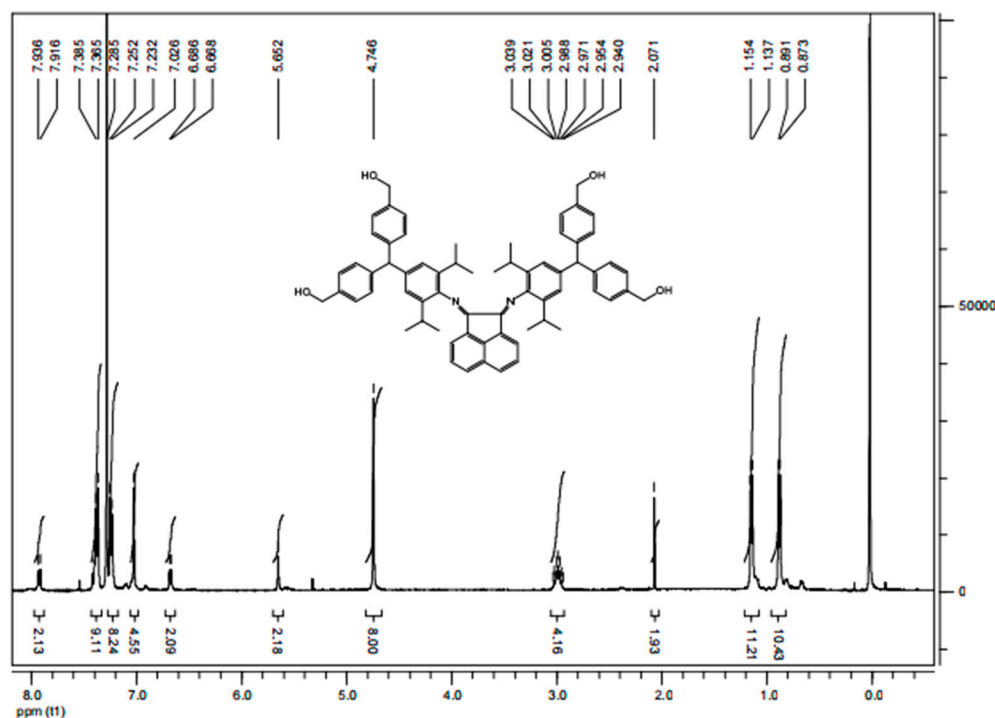

Figure S1 The <sup>1</sup>H NMR spectrum of L1

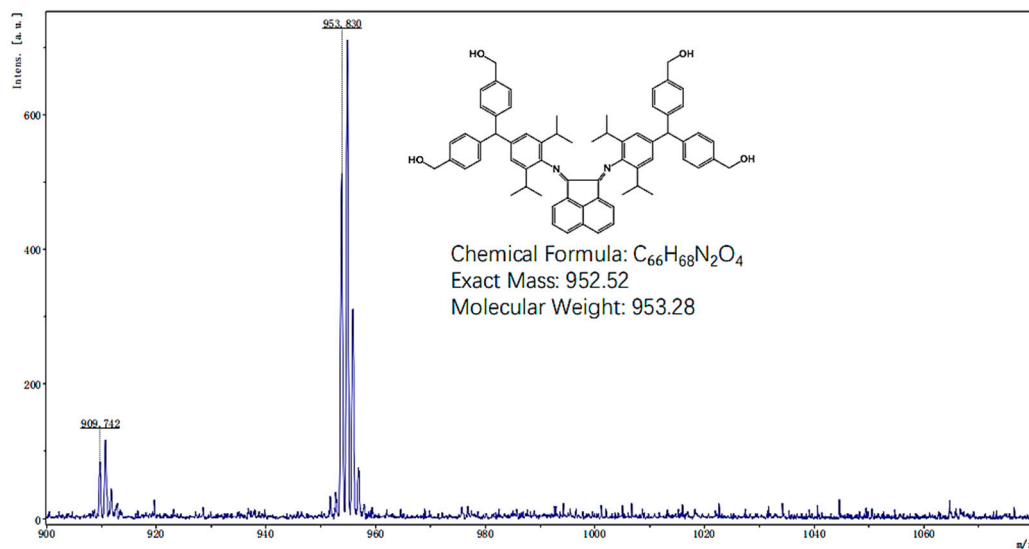

**Figure S2** The MS(ESI) spectrum of **L1**

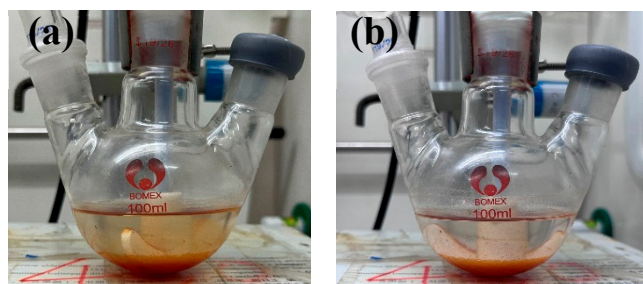

**Figure S3** Preparation process of supported catalyst **S-CatA-1**

(a) Reaction of 1 minute; (b) Reaction of 5 minutes

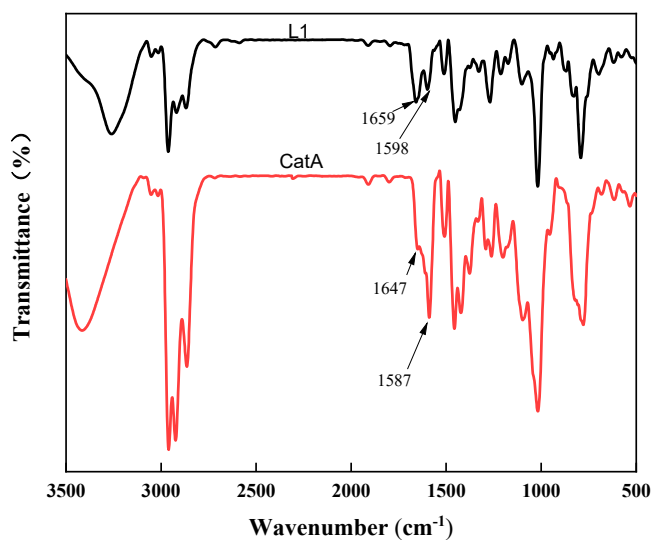

**FigureS4** FT-IR spectra of **L1** and corresponding complex **CatA**

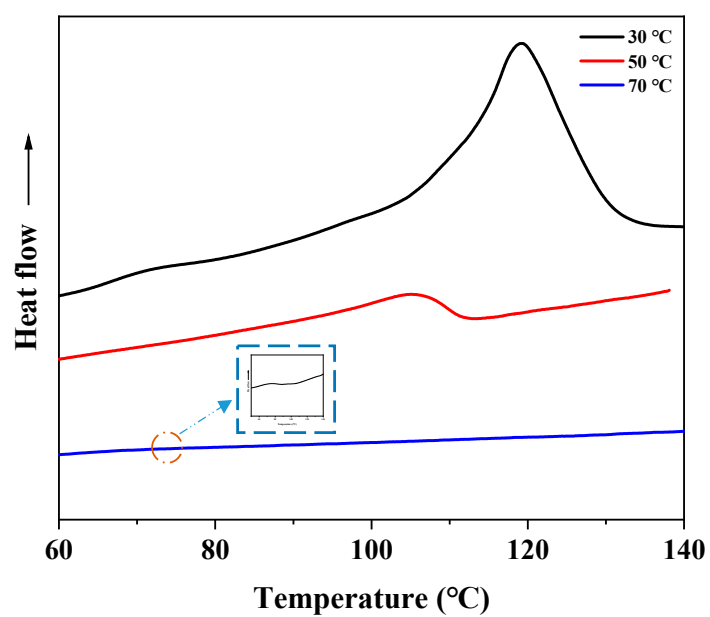

**FigureS5** DSC curves of polyethylenes prepared by CatA in toluene solvent (Entries 5, 6, 7 in Table 1)

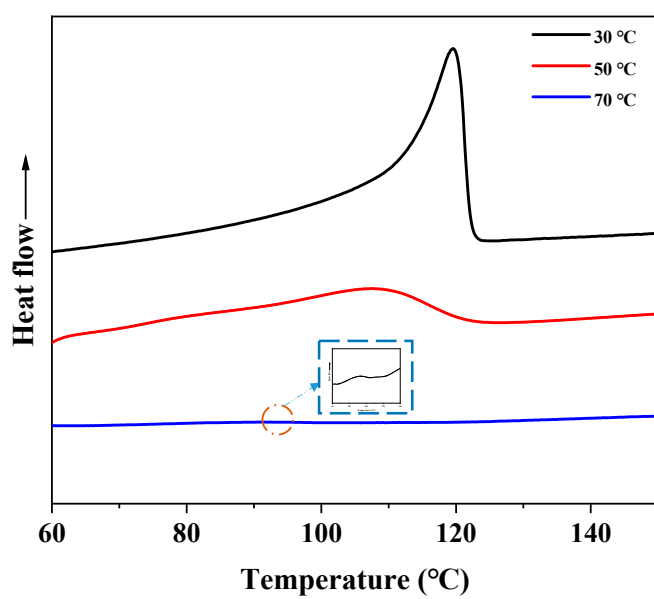

**FigureS6** DSC curves of polyethylenes prepared by CatA in n-hexane solvent (Entries 1, 2, 3 in Table 1)

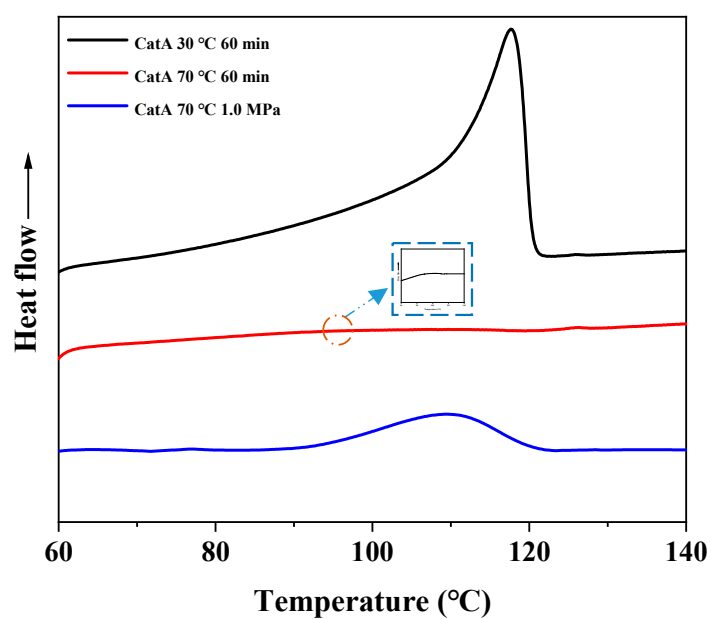

**FigureS7** DSC curves of polyethylenes prepared by **CatA** in n-hexane solvent at different conditions (Entries 4, 8, 9 in Table 1)

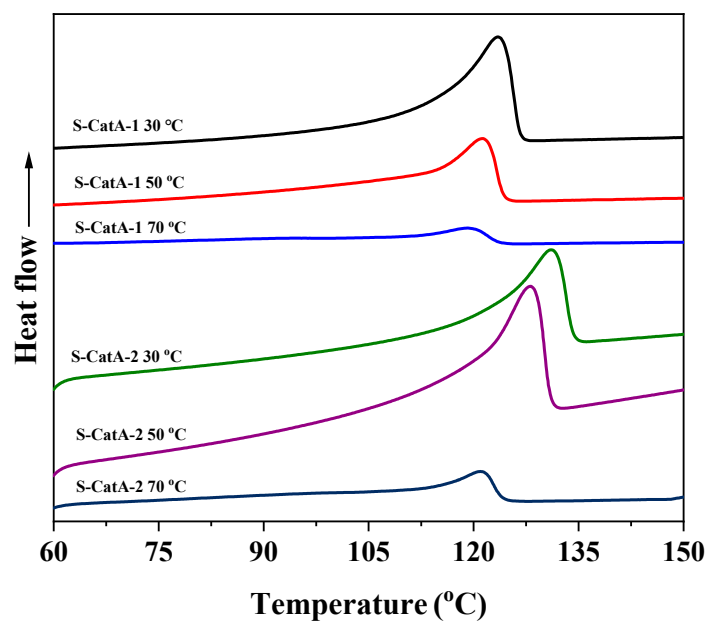

**FigureS8** DSC curves of polyethylenes prepared with heterogeneous catalysts at different temperatures (Entries 1, 2, 3, 5, 6, 7 in Table 3)

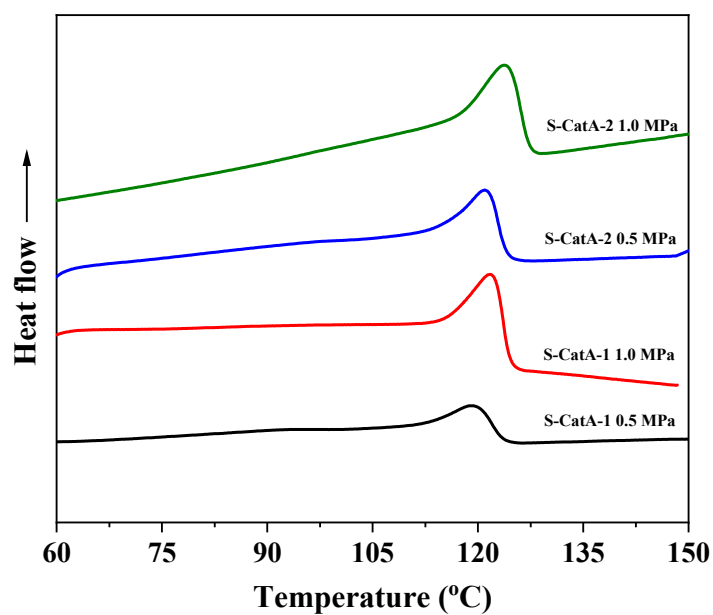

**FigureS9** DSC curves of polyethylenes prepared S-CatA-1/2 at different pressures at 70 °C (Entries 3, 4, 7, 9 in Table 3)

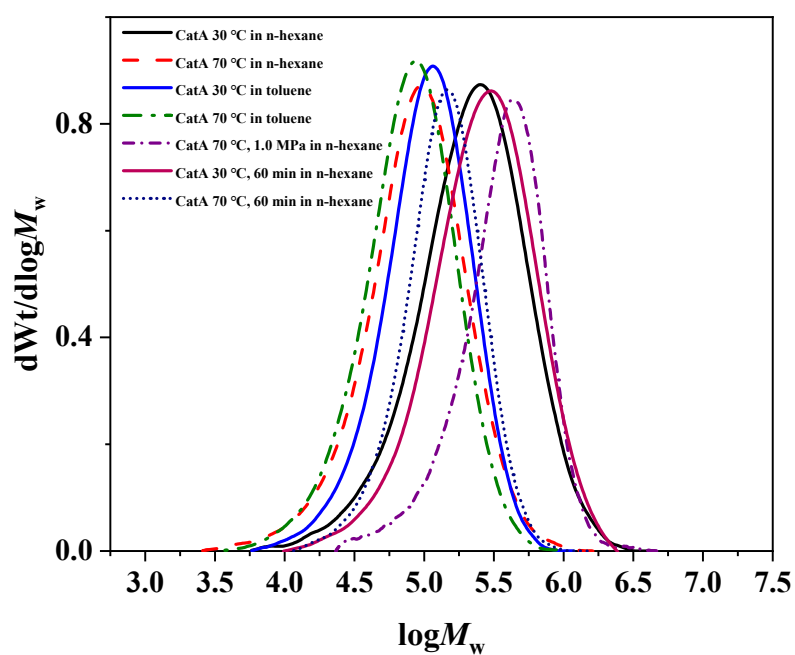

**FigureS10** GPC curves of polyethylenes prepared by CatA at different conditions (Entries 1, 3, 4, 5, 7, 8, 10 in Table 1)

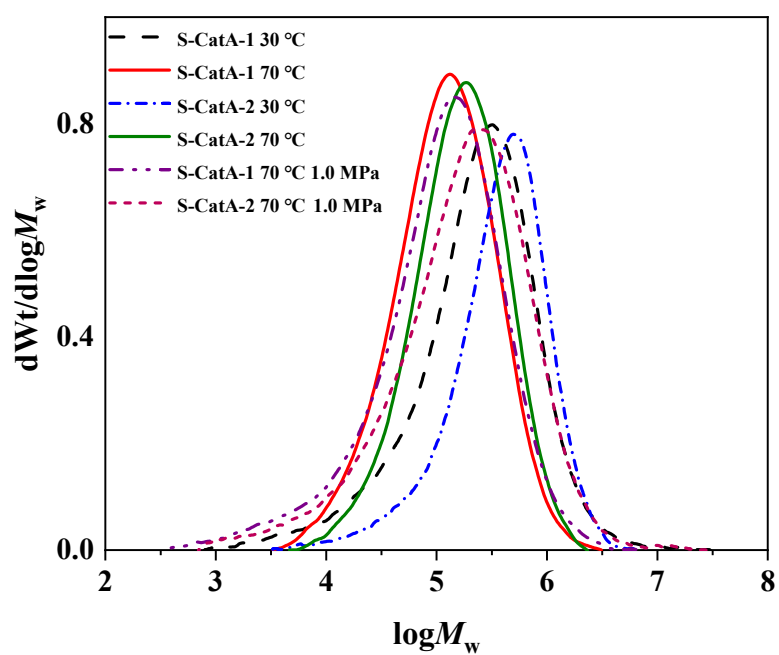

**FigureS11** GPC curves of polyethylenes prepared by S-CatA-1/2 catalysts (Entries 1, 3, 4, 5, 7, 9 in Table 3)

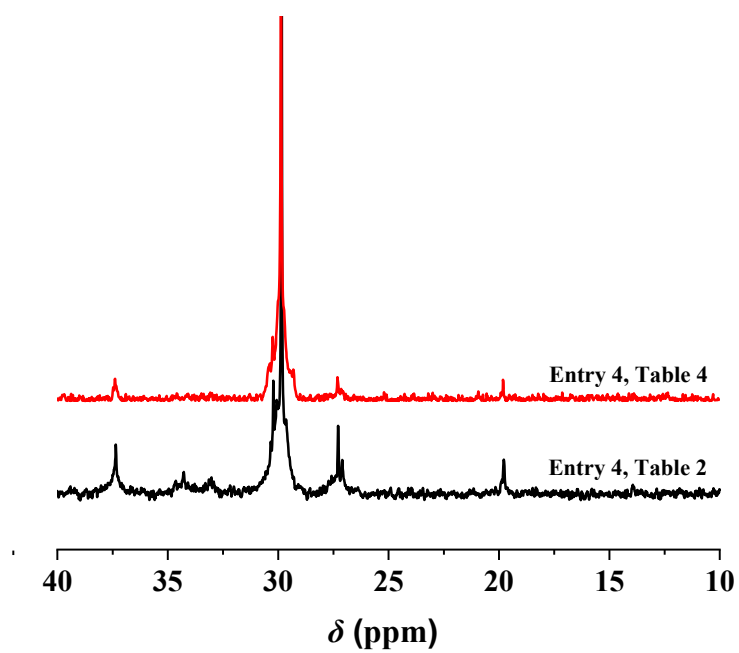

**FigureS12**  $^{13}\text{C}$  NMR spectra of polyethylenes prepared by CatA, S-CatA-1 at 70 °C, 1.0 MPa (Entry 4 in Table 1, Entry 4 in Table 3)
